# Supplementary material for: A theory on individual characteristics of successful coding challenge solvers
Source: PeerJ Comput Sci. 2019 Feb 4;5:e173. doi: 10.7717/peerj-cs.173 (PMC7924443; doi:10.7717/peerj-cs.173)
Supplement: Supplemental Information 1 [file peerj-cs-05-173-s001.xlsx]

## Sheet: Introduction
A theory on individual characteristics of successful coding challenge solvers
Authors:	Marvin Wyrich
	Daniel Graziotin
	Stefan Wagner
The present dataset provides raw, anonymized data as well as the data analysis of the study titled “A Theory on Individual Characteristics of Successful Coding Challenge Solvers”. For anonymity reasons, identifying variables such as those related to academic status, age, gender, and experience are not linked to the participant’s IDs.

## Sheet: Correlation results
Correlation results
Variable	n	Pearson's r	t	p	Spearman's rank cc	t	p
SPANE-B	31	0.156682	0.85431	0.399936	0.0546507	0.294743	0.77029
SPANE-P	31	0.0788674	0.426041	0.673224	0.0305648	0.164674	0.870343
SPANE-N	31	-0.199106	-1.09412	0.282905	-0.139366	-0.757904	0.454624
positive	31	-0.0575979	-0.31069	0.758259	-0.148346	-0.807804	0.42578
negative	31	0.109896	0.595416	0.556184	0.165554	0.904009	0.37344
good	31	0.0624302	0.336854	0.738653	-0.0301315	-0.162337	0.872167
bad	31	-0.336909	-1.92696	0.063833	-0.237144	-1.31456	0.19896
pleasant	31	0.312183	1.7696	0.0873095	0.254257	1.41574	0.167502
unpleasant	31	-0.0736688	-0.397799	0.693691	0.0129108	0.0695326	0.945043
happy	31	-0.0242316	-0.13053	0.897049	-0.14868	-0.809663	0.424728
sad	31	-0.38318	-2.234	0.0333572	-0.389874	-2.27995	0.030148
joyful	31	0.00815488	0.0439169	0.965272	-0.0620348	-0.334712	0.740251
afraid	31	0.0965126	0.522174	0.605516	-0.00496168	-0.0267198	0.978866
contented	31	0.00711669	0.0383255	0.969691	-0.052261	-0.281819	0.780083
angry	31	-0.178046	-0.974375	0.337928	-0.13474	-0.732277	0.469877
Extraversion	32	-0.227912	-1.28206	0.209639	-0.205367	-1.14934	0.259497
Agreeableness	32	-0.0575167	-0.315554	0.754526	-0.0586603	-0.32185	0.749798
Conscientiousness	32	-0.351578	-2.057	0.048472	-0.293881	-1.68401	0.102558
Neuroticism	32	-0.0984781	-0.542021	0.591807	-0.242123	-1.36683	0.181834
Openness	32	0.0687723	0.377575	0.708404	-0.0180461	-0.0988589	0.921908
Current grade average	31	-0.448075	-2.69907	0.0114754	-0.443934	-2.66796	0.0123591
Study progress	32	0.224763	1.26341	0.216174	0.178504	0.993667	0.328333
BSc grading (only master)	10	-0.619771	-2.23371	0.0559721	-0.553044	-1.8775	0.0972785
Data structures and algorithms	18	-0.557427	-2.68566	0.0162417	-0.694037	-3.85608	0.0013973
Algorithms and complexity	19	-0.183367	-0.769082	0.452398	-0.370103	-1.64261	0.11883
Coding Challenge exp.	32	0.151992	0.84228	0.406296	0.227253	1.27816	0.210995
Programming exp.	32	0.420111	2.53566	0.0166698	0.328363	1.9041	0.0665275
Java exp.	32	0.183516	1.02252	0.314709	0.201687	1.12786	0.268318
Work exp.	32	0.323064	1.86975	0.071306	0.195753	1.09333	0.282949
GitHub
Stack Overflow

## Sheet: Challenge results
Challenge results
	Challenge 1	Challenge 2	Challenge 3	Score		Score table
P01	O(n)	O(n)	O(n)	4		Challenge 1		Challenge 2		Challenge 3
P02	O(n * log n)	-	O(n)	2.66		Complexity	Score	Complexity	Score	Complexity	Score
P03	O(n²)	O(n)	O(3^n)	2.33		O(n)	1	O(n)	1	O(n)	1
P04	O(n²)	O(n)	O(3^n)	2.33		O(n * log n)	0.66	O(n * w)	0.5	O(3^n)	0.5
P05	O(n²)	O(n)	O(3^n)	2.33		O(n²)	0.33
P06	O(n²)	O(n * w)	O(3^n)	1.83
P07	O(n²)	O(n)	-	1.33		Factor:	1		1		2
P08	O(n²)	O(n)	-	1.33
P09	O(n²)	O(n)	-	1.33
P10	O(n²)	O(n)	-	1.33
P11	O(n²)	O(n)	-	1.33
P12	O(n²)	O(n * w)	-	0.83
P13	O(n²)	O(n * w)	-	0.83
P14	O(n²)	O(n * w)	-	0.83
P15	O(n²)	O(n * w)	-	0.83
P16	O(n²)	O(n * w)	-	0.83
P17	O(n²)	O(n * w)	-	0.83
P18	O(n²)	O(n * w)	-	0.83
P19	O(n²)	O(n * w)	-	0.83
P20	O(n²)	O(n * w)	-	0.83
P21	O(n²)	O(n * w)	-	0.83
P22	O(n²)	O(n * w)	-	0.83
P23	O(n²)	-	-	0.33
P24	O(n²)	-	-	0.33
P25	O(n²)	-	-	0.33
P26	O(n²)	-	-	0.33
P27	O(n²)	-	-	0.33
P28	O(n²)	-	-	0.33
P29	-	-	-	0
P30	-	-	-	0
P31	-	-	-	0
P32	-	-	-	0

## Sheet: Time pressure
Time pressure
	Challenge 1	Challenge 2	Challenge 3		Statement: I felt under time pressure for challenge x
P01	2	1	1		5 - fully agree
P02	1	1	3		1 - not agree
P03	3	2	5
P04	1	1	4
P05	2	1	1
P06	1	1	2
P07	5	1	5
P08	3	1	5
P09	1	1	5
P10	1	1	1
P11	1	3	5
P12	4	3	5
P13	1	3	5
P14	1	1	5
P15	2	2	5
P16	1	1	2
P17	2	3	5
P18	1	1	3
P19	2	3	5
P20	3	3	5
P21	1	2	2
P22	3	1	5
P23	1	2	3
P24	1	2	4
P25	3	4	3
P26	3	4	4
P27	3	1	5
P28	1	2	3
P29	5	5	4
P30	4	3	3
P31	3	5	5
P32	5	5	5

## Sheet: SPANE
SPANE
Hint: dropped record for P16 from all SPANE calculations, because no frequency indicated for 'good'
1 - very rarely or never
5 - very often or always
	positive	negative	good	bad	pleasant	unpleasant	happy	sad	joyful	afraid	contented	angry	SPANE-P	SPANE-N	SPANE-B
P01	4	2	4	1	5	1	4	1	3	2	4	1	24	8	16
P02	4	3	5	2	4	3	3	1	5	3	3	1	24	13	11
P03	4	3	4	2	4	3	4	2	3	3	5	2	24	15	9
P04	4	3	4	2	4	3	4	2	4	1	4	2	24	13	11
P05	4	2	5	2	4	2	5	1	4	1	3	2	25	10	15
P06	4	1	4	1	4	1	4	1	3	1	3	1	22	6	16
P07	4	2	4	2	4	2	5	1	3	1	4	1	24	9	15
P08	4	4	3	3	2	3	4	2	4	2	4	1	21	15	6
P09	4	3	4	2	3	3	4	1	3	1	4	4	22	14	8
P10	3	2	3	2	4	2	3	1	3	2	3	2	19	11	8
P11	4	2	4	2	4	3	4	1	4	2	4	2	24	12	12
P12	4	2	4	2	5	1	4	2	4	3	4	1	25	11	14
P13	4	2	4	3	4	3	4	2	4	1	4	4	24	15	9
P14	3	4	2	3	2	4	1	2	1	1	2	4	11	18	-7
P15	4	2	5	3	3	2	4	1	3	3	4	1	23	12	11
P16	4	2		1	4	2	4	1	3	1	5	1
P17	4	2	4	2	4	2	4	1	3	1	4	2	23	10	13
P18	4	2	4	2	4	2	4	1	3	1	3	1	22	9	13
P19	4	2	5	2	4	1	4	3	3	1	4	2	24	11	13
P20	4	2	4	2	4	2	4	3	4	1	4	3	24	13	11
P21	4	3	4	3	4	1	4	4	2	2	3	1	21	14	7
P22	3	4	2	3	2	4	3	3	2	2	3	1	15	17	-2
P23	4	1	4	1	4	2	5	1	3	1	3	1	23	7	16
P24	4	2	4	2	4	2	4	1	5	1	4	1	25	9	16
P25	4	3	5	3	3	2	4	3	4	2	3	2	23	15	8
P26	4	2	4	2	4	1	5	1	4	1	5	1	26	8	18
P27	4	1	4	2	4	2	4	1	3	1	3	1	22	8	14
P28	5	1	5	1	5	1	5	1	5	3	5	1	30	8	22
P29	4	3	4	3	3	3	4	4	3	2	4	3	22	18	4
P30	4	2	5	2	4	2	5	3	4	2	5	2	27	13	14
P31	4	2	4	2	3	3	4	3	4	2	4	3	23	15	8
P32	4	3	3	3	2	4	2	3	3	2	2	3	16	18	-2

## Sheet: Personality
Personality
	Extraversion	Agreeableness	Conscientiousness	Neuroticism	Openness
P01	-2	11	-1	0	21		Note: each statement was rated by the participants from 0 to 4, then aggregated to the five personality traits.
P02	2	2	-2	7	5
P03	-5	13	11	1	8
P04	11	14	8	1	22
P05	8	8	2	-7	24
P06	11	0	7	-2	17
P07	6	12	4	-1	16
P08	4	13	12	2	8
P09	-8	-4	4	3	16
P10	-1	4	1	0	9
P11	1	14	1	-1	27
P12	8	13	7	-4	7
P13	6	7	1	1	16
P14	7	5	10	5	26
P15	3	8	6	3	16
P16	12	14	-2	-4	11
P17	3	10	8	3	11
P18	14	6	8	-8	15
P19	4	7	11	-3	9
P20	8	8	7	0	11
P21	7	14	4	-7	23
P22	-7	7	15	3	12
P23	6	11	7	-7	20
P24	13	4	-1	0	11
P25	13	9	5	-1	17
P26	8	4	4	4	15
P27	1	12	12	2	14
P28	3	16	13	3	10
P29	9	14	5	7	17
P30	8	9	14	2	25
P31	-3	8	9	3	17
P32	2	7	6	4	8

## Sheet: Academic
Academic
Note: the following columns are not interconnected and not connected to the performance score
Data structues and algorithms course grading	Algorithms and complexity course gradings	Current grade point average	BSc grade point average			Performance score by study progress*
1	1.3	1.3	1.5
1	1.7	1.4	1.5			Median BSc 2nd	0.83
1	2.3	1.5	1.7			Median BSc high	1.83
1	2.3	1.5	1.9			Median Msc	0.83
1	2.7	1.5	1.9
1	2.7	1.6	2.2			Avg BSc 2nd	0.664286
1.3	2.7	1.6	2.2			Avg BSc high	1.885
1.3	2.7	1.6	2.4			Avg MSc	1.07273
1.3	3	1.7	2.4
1.3	3.3	1.7	2.6			Best BSc 2nd	1.83
1.3	3.3	1.7				Best BSc high	2.66
1.7	3.7	1.7				Best MSc	4
1.7	3.7	1.7
2.3	3.7	1.8				Worst BSc 2nd	0
2.3	4	1.8				Worst BSc high	1.33
2.7	4	1.9				Worst MSc	0.33
3.3	4	1.9
3.3	4	1.9
	4	2				*study progress was mapped from the program and current semester to one of three groups: (1) students at the end of the second semester, (2) students in a higher bachelor semester and (3) master students.
		2
		2.1
		2.2
		2.3
		2.7
		3
		3
		3
		3
		3
		3.3
		3.5

## Sheet: Experience
Experience
Note: the following columns are not interconnected and not connected to the performance score
CC exp.*	Programming exp.**	Java exp.**	Work exp.**	SO reputation	# Created pull requests (public)		* CC exp in the last year:	0	Never
0	0.5	0.5	0	1	1			1	1-2 times per semester
0	1	1	0	2 - 500	1			2	1-2 times per month
0	1.5	1	0	2 - 500	6			3	once per week
0	2	1	0	> 5000	6			4	2-3 times per week
0	3	1	0		14			5	daily
0	3	1	0		28
0	3	2	0		42		** in years
0	3	2	0		146
0	3.5	3	0
0	3.5	3	0
0	4	3	0
0	4	3	0
0	4	3.5	0
0	4	3.5	0
0	4	3.5	0
0	5	4	0
0	5	4	0
0	5	4	0
0	5	4	0.25
0	5	4	0.25
0	6	5	0.5
1	6.5	5	1
1	7	5	1
1	7	5	1
1	7	5	1.5
1	7	6	3
2	7	6	3
2	7	6	3
2	8	6	3.5
2	8	6	4
2	10	7	5
3	11	9	5

## Sheet: Sample description
Sample Description
Note: the following columns are interconnected but are not connected to the performance score
Age	Male=1 / Female=2
19	2
19	2
19	1
19	1
19	1
19	1
20	2
20	1
20	1
20	1
20	2
21	1
21	1
21	1
21	1
21	1
21	1
21	1
22	1
23	1
23	1
23	1
23	1
24	1
24	1
24	2
24	1
25	1
25	1
26	1
26	1
27	1
